# Supplementary material for: Crosstalk Between Metabolism and Immune Activity Reveals Four Subtypes With Therapeutic Implications in Clear Cell Renal Cell Carcinoma
Source: Front Immunol. 2022 Apr 11;13:861328. doi: 10.3389/fimmu.2022.861328 (PMC9035905; doi:10.3389/fimmu.2022.861328)
Supplement: Supplementary file 7 [file Table_1.xlsx]

## Sheet: Sheet1
Table S1. Datasets utilizied in this study
Cancer type	Source	Sample size
ccRCC	TCGA: TCGA-KIRC	Tumor samples (N=525), Normal sample(N=72)
	GEO: GSE53757	Tumor samples (N=72), Normal sample(N=72)
	GEO: GSE15641	Tumor samples (N=32), Normal sample(N=23)
	GEO: GSE66272	Tumor samples (N=27), Normal sample(N=27)
	ICGC: RECA-EU	Tumor samples (N=92)
	Braun et al. (Anti-PD-1 therapy) PMID: 7499153	Responders (N=8), Nonresponders (N=8)
	GEO: GSE64052 (Sunitinib therapy)	Sunitinib sensitive sample (N=5), Sunitinib resistant sample (N=4)
Bladder cancer	IMvigor210 (Anti-PD-1 therapy)	Responders (N=68), Nonresponders (N=230)
Melanoma	GEO: GSE91061 (Anti-PD-1 therapy)	Responders (N=24), Nonresponders (N=18)
Radiomic data (ccRCC)	TCIA: TCGA-KIRC	Tumor samples (N=133)
	Zhongshan Hospital	Tumor samples (N=45)
